# Supplementary material
Source: PubMed Central journal article supplement (PMC3600444)
Supplement: 1217060110_pnas.201217060SI.pdf [file 1217060110_pnas.201217060SI.pdf]

# Supporting Information

Bajgar et al. 10.1073/pnas.1217060110

## SI Methods

**Sequences and Cloning.** Genes concerned in this study were isolated by RT-PCR with degenerate primers corresponding to conserved protein motifs, followed by extension of the obtained products by using 3' and 5' RACE (Ambion). Some sequences were retrieved by using BLAST from a 454 sequencing run (GATC Biotech), PCR-amplified, and verified by sequencing. Sequences are available from GenBank under the following accession nos.: *cryptochrome2* (*cry2*) (1562936), *Par domain protein1* (*Pdp1*)<sub>iso1</sub> (1563012), *Pdp1*<sub>iso2</sub> (1563013), *cycle* (*cyc*) (1562940), *Clock* (*Clk*) (1562939), *Clockwork orange* (*cwo*) (1563010), *tango* (*tgo*) (1563014), *taiman* (*tai*) (1562945), *lipase* (*lip*) (1563016), *defensin* (*def*) (1563019), *esterase* (*est*) (1563020), *superoxide dismutase* (*sod*) (1563024), *transferrin* (*tf*) (1563021), *Methoprene*

*tolerant* (*Met*) (JN416984), and *Krüppel-homolog 1* (*Kr-h1*) (JN416987).

**Northern Blot Hybridization.** Total RNA was isolated from guts of *Pyrhocoris apterus* females by using TRIzol reagent (Invitrogen), and transferred with the NorthernMax kit (Ambion). The membrane was hybridized overnight at 65 °C with a *cry2* antisense RNA probe that was generated from a PCR-amplified cDNA fragment (primers shown in Table S3) with the T7/T3 MaxiScript system (Ambion) using digoxigenin-conjugated dUTP (Roche). Chemiluminescent signal was detected by the Luminoimage analyzer LAS-3000 (Fujifilm). Band intensities were determined densitometrically with Advanced Image Data Analyzer software (Raytest), with relative expression ratio being calculated for each band.

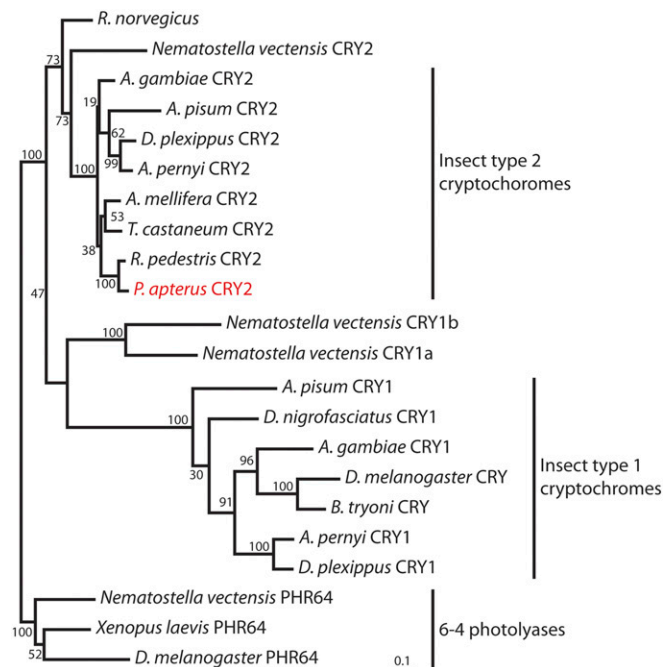

**Fig. S1.** A phylogenetic tree showing relationships among cryptochromes (Crys). Cry proteins were aligned by using the ClustalW method in Mega software (1), and this alignment was analyzed in the RAxML program (2) to construct a maximum likelihood tree ( $-\ln = 12550.9981$ ; WAG substitution matrix). Bootstrap values are given at the nodes (500 replicates). Sequences are unambiguously clustered into three groups: (i) type 1 cryptochromes containing *Drosophila* Cry and insect Cry1 genes, (ii) type 2 cryptochromes containing insect Cry2 and mammalian Crys, and (iii) 6-4 photolyases. The *P. apterus* cryptochrome sequence clearly belongs to the Cry2 group, with the closest relative being from the bean bug *Riptortus pedestris*. The following protein sequences were used: *P. apterus* (1562936), *R. pedestris* (BAG07408), *Tribolium castaneum* (EFA04537), *Apis mellifera* (NP\_001077099), *Anopheles gambiae* Cry2 (ABB29887), *Danaus plexippus* Cry2 (ABA62409), *Antheraea pernyi* Cry2 (EF117813), *Acyrtosiphon pisum* Cry2 (FN377570), *Rattus norvegicus* Cry2 (AAK61419), *A. pisum* Cry1 (FN377569), *D. plexippus* Cry1 (EHJ63675), *A. pernyi* Cry1 (AAK11644), *Dianemobius nigrofasciatus* (BAF45421), *A. gambiae* Cry1 (ABB29886), *Bactrocera tryoni* (AAU14170) and *Drosophila melanogaster* Cry (NP\_732407), *Nematostella vectensis* Cry1a (XP\_001631029), Cry1b (XP\_001632849), Cry2 (XP\_001623146), 6-4 photolyase (PHR64, XP\_001636303), *D. melanogaster* 6-4 photolyase (PHR64, NP\_724274), and *Xenopus laevis* 6-4 photolyase (PHR64, NP\_001081422).

1. Tamura K, et al. (2011) MEGA5: Molecular evolutionary genetics analysis using maximum likelihood, evolutionary distance, and maximum parsimony methods. *Mol Biol Evol* 28(10): 2731–2739.

2. Stamatakis A (2006) RAxML-VI-HPC: Maximum likelihood-based phylogenetic analyses with thousands of taxa and mixed models. *Bioinformatics* 22(21):2688–2690.



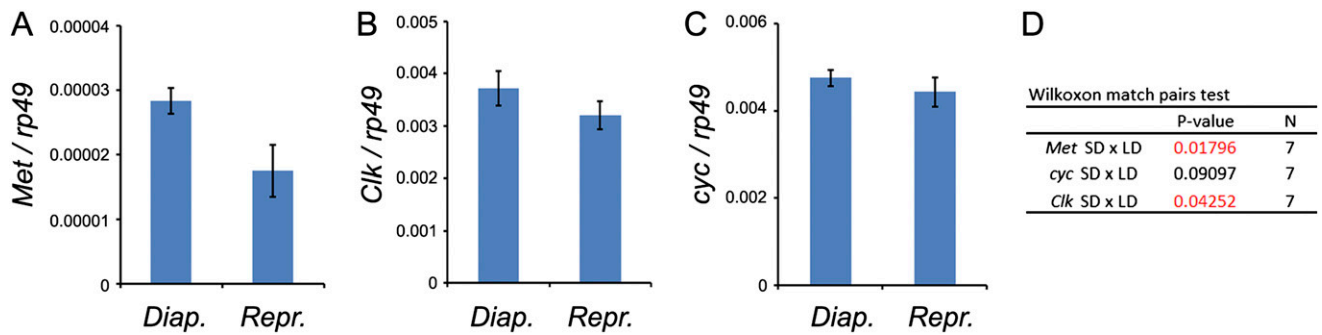

**Fig. S5.** Expression of *Met* (A), *Clk* (B), and *cyc* (C) in the guts of 7-d old diapause and reproductive females. Levels of *Met* (A) and *Clk* (B) are significantly higher in diapause females compared with reproductive ones (statistical values are shown in D). Relative mRNA levels were normalized to *rp49* expression. Data are mean  $\pm$  SEM from seven independent samples.

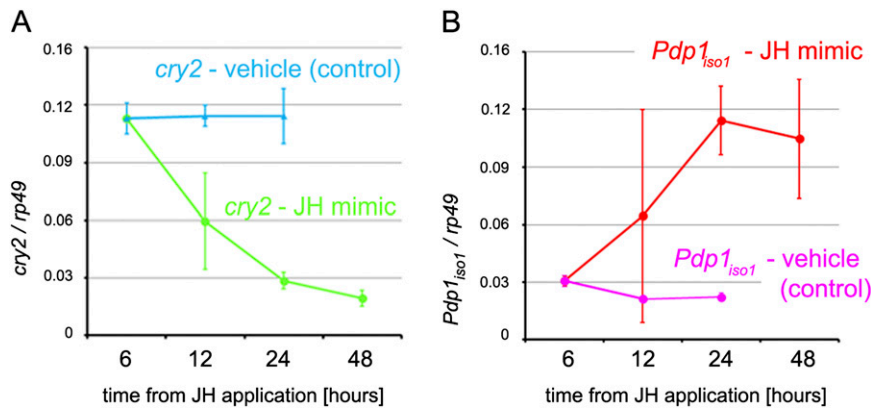

**Fig. S6.** The juvenile hormone (JH) mimic methoprene switches *cry2* and *Pdp1<sub>101</sub>* expression patterns in the gut from the diapause to the reproductive mode. Guts were dissected from 4- to 7-d old adult diapause females and cultured in 100  $\mu$ L of Grace insect medium supplemented with antibiotics. After addition of 4  $\mu$ L of acetone (control) or 4  $\mu$ L of acetone-diluted 0.3 mM methoprene (final concentration of approximately 12  $\mu$ M), the tissues were incubated and sampled for qRT-PCR at the indicated time points. The JH mimic suppressed the normally high *cry2* mRNA levels (A) and enhanced the normally low *Pdp1<sub>101</sub>* expression (B) occurring in the gut of diapause females. Each value is a mean  $\pm$  SEM from three independent gut culture experiments.

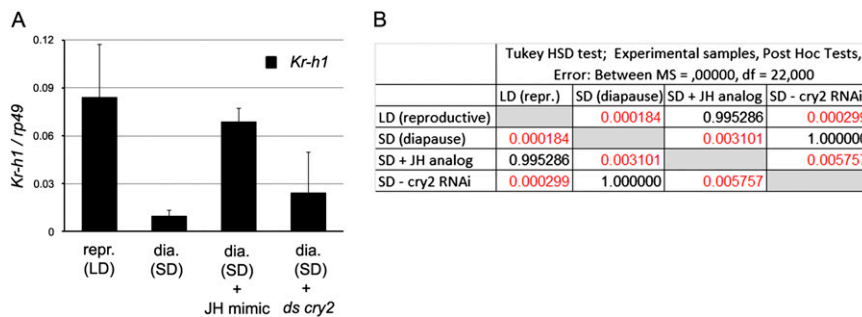

**Fig. S7.** Expression of the JH-dependent *Kr-h1* gene in the gut. (A) Transcription of *Kr-h1* was high in the gut of reproductive females that naturally produce JH, and low in diapause females that lack JH. The JH mimic methoprene induced *Kr-h1* when applied to diapausing animals. However, expression of *Kr-h1* in the gut of *cry2* RNAi females remained at levels comparable to those in untreated diapause females, suggesting that the loss of *cry2* function did not increase JH titer. Values are mean  $\pm$  SEM from three independent experiments. (B) Red color marks statistically significant differences between values in A as assessed by the Tukey honestly significant difference test.

**Table S1. Statistical significance of correlation between *cry2*, *Pdp1<sub>iso1</sub>*, and downstream gene expression in Fig. 3**

| Gene        | <i>Pdp1<sub>iso1</sub></i> | <i>cry2</i> |
|-------------|----------------------------|-------------|
| <i>cry2</i> | -0.56*                     | +1.00       |
| <i>lip</i>  | +0.64*                     | -0.61*      |
| <i>def</i>  | +0.72*                     | -0.55*      |
| <i>sod</i>  | -0.51*                     | +0.68*      |
| <i>est</i>  | +0.70*                     | -0.59*      |
| <i>tf</i>   | -0.77*                     | +0.74*      |

\*Significant correlation at  $P < 0.01$  (Spearman rank-order correlations).

**Table S2. Primers used for qRT-PCR analyses**

| Gene                       | Forward primer           | Reverse primer              |
|----------------------------|--------------------------|-----------------------------|
| <i>cry2</i>                | GCGGTCGCCTGTTTTGACTCG    | ACATCCACATACCAGCATTTACA     |
| <i>Pdp1<sub>iso1</sub></i> | AGATCCAGAATTAGAAGCAGTCAC | GGTCAGTGTGTAAGGGAGCGTC      |
| <i>Pdp1<sub>iso2</sub></i> | CGGCCAGGTGGTCGCAGTA      | GGTCAGTGTGTAAGGGAGCGTC      |
| <i>rp49</i>                | CCGATATGTAAACTGAGGAGAAAC | GGAGCATGTGCTGGTCTTTT        |
| <i>Met</i>                 | TTCTGATGATGGTAAAAGATG    | TATCGCCCTGACTACTTGG         |
| <i>cyc</i>                 | TGCCTTGATGCCATGGGTAGAG   | ATTATTTGTTTCCATAGTATTCGTAAG |
| <i>Clk</i>                 | CCAACTTCATCACTTGTCCAG    | CCCTTCGTAAGAAATCTATAGTAG    |
| <i>cwo</i>                 | CCAACTTCATCACTTGTCCAG    | TAACGGAGGTGGCCTGAAG         |
| <i>tgo</i>                 | TCCAAGCTCCTTATCACAAAC    | AAAGTTCGTGAGGTTGGTTGG       |
| <i>lip</i>                 | CCTTTGCAACAACGCTCTCTAC   | CATCTGAGGCCTTGCTATGTA       |
| <i>def</i>                 | CACAGTAGTTGTAGCAATGGC    | CATCGCGAGTGGTTGGAG          |
| <i>est</i>                 | GGGCCGATGTATGCTTACATATT  | CTTACATTCTTGCTCTTGTGACG     |
| <i>sod</i>                 | ACCCCATCACGGAGGACC       | TCGTCCGAAGTCGTCCTTG         |
| <i>tf</i>                  | TTCGACTGTAGAGCAATCCATG   | CCTGGAGGAATAGTGATTAGACC     |
| <i>Kr-h1</i>               | GAACGTCTTGTATCACACACC    | CCCTACCAGTGAACCTTTTGC       |

**Table S3. PCR primers for cloning of dsRNA templates and for the *cry2* hybridization probe**

| Gene                       | Forward primer           | Reverse primer              |
|----------------------------|--------------------------|-----------------------------|
| <i>cry2</i>                | TTGAAGAAGACCCAGAACCATT   | CAAAAACCTTCATTCTTCTTC       |
| <i>Pdp1<sub>iso1</sub></i> | AGTCTACCGCCGATGGCAAGGTG  | TCCTTCACAATCAGGGTCATGGTG    |
| <i>Pdp1<sub>iso2</sub></i> | GAGGGGATGGTGTAGGAGTG     | TCCATTGATAAACATGTGATGTTG    |
| <i>cyc</i>                 | CAGGAAAATGGATAAGCTACGG   | CCCTTCGTAAGAAATCTATAGTAG    |
| <i>Clk</i>                 | TGCCTTGATGCCATGGGTAGAG   | ATTATTTGTTTCCATAGTATTCGTAAG |
| <i>cwo</i>                 | ATGATGGAGCACACCTGTTGG    | GGCCGGTATTGAGTTCTC          |
| <i>tgo</i>                 | ATGGCCGATGTTTATGATAAGGTC | CGGAGGCGTATAACCAAGG         |
| <i>tai</i>                 | GCCTCCTTACCGACATGAGCAG   | ACTGCACTCTCACATTGCATGAGCG   |
